# Supplementary material
Source: publisher figshare collection journal article supplement (https://acs.figshare.com/ndownloader/files/15593921)
Supplement: Supplementary file 1 [file 15593921]

			17.80%		29.70%		39.90%		50.00%		60.70%		71.40%		80.70%		90.00%		100.00%
Nominal q (1/�)	q (1/�)	q std. dev. (1/�)	I (1/cm)	I std. dev. (1/cm)	I (1/cm)	I std. dev. (1/cm)	I (1/cm)	I std. dev. (1/cm)	I (1/cm)	I std. dev. (1/cm)	I (1/cm)	I std. dev. (1/cm)	I (1/cm)	I std. dev. (1/cm)	I (1/cm)	I std. dev. (1/cm)	I (1/cm)	I std. dev. (1/cm)	I (1/cm)	I std. dev. (1/cm)
0.005115	0.005223	0.00109	0.697320992	0.11398024	1.548055697	0.12477875	2.76132074	0.18249455	4.495351013	0.1941124	8.341459209	0.2559315	11.32295176	0.29235734	14.10573324	0.27970799	17.33678566	0.3485306	22.22687397	0.36051011
0.005524	0.005624	0.001093	0.610899152	0.11297365	1.653923697	0.11609197	2.95881214	0.15517674	4.531951413	0.16593291	8.155408809	0.23143235	11.62646476	0.31997793	13.92975624	0.30664119	16.96225666	0.33575689	22.03769297	0.31104486
0.005934	0.006027	0.001097	0.584960782	0.098422602	1.632661197	0.10442501	2.86294964	0.13210299	4.528201213	0.15124854	8.269040309	0.21515739	11.33670276	0.26668041	13.78418324	0.30350813	17.04012166	0.31449443	21.62729797	0.33229829
0.006343	0.00643	0.001101	0.612780862	0.083719097	1.564406897	0.093883717	3.02244374	0.1337678	4.519398413	0.13877014	8.271583709	0.21672837	11.32482976	0.23878559	13.86477124	0.29882212	17.29100166	0.27960551	21.47015997	0.32936903
0.006752	0.006834	0.001105	0.556880972	0.077376003	1.570691797	0.090361443	3.09663824	0.13127764	4.458126913	0.13494188	8.042038709	0.20539423	11.46070676	0.23828642	13.68204024	0.23370507	17.17143866	0.29834969	21.50018697	0.32269338
0.007161	0.007238	0.00111	0.632349112	0.072538161	1.607932897	0.080276415	2.85625304	0.11982875	4.509938813	0.13001484	8.175288609	0.16649639	11.31770276	0.24631445	13.74188324	0.22385141	16.83321466	0.26886145	21.06995797	0.29262181
0.00757	0.007643	0.001116	0.578785592	0.072036898	1.506483397	0.078830174	2.96821734	0.11399737	4.514035813	0.1193101	8.210649609	0.17321541	11.18183376	0.23776012	13.46927624	0.24146626	16.44506566	0.27603246	21.30275897	0.26914515
0.007979	0.008049	0.001121	0.651513822	0.06842214	1.487120197	0.077801169	2.85209094	0.1097715	4.458137113	0.11514232	8.074010609	0.18236214	10.96810476	0.22941836	13.60010924	0.21281649	16.67269466	0.27195557	20.94689697	0.27247331
0.008389	0.008455	0.001128	0.593878062	0.057045245	1.685958197	0.067188091	2.79892304	0.097940788	4.326230213	0.11444632	7.913467509	0.16289208	11.42513576	0.21702214	13.59378524	0.21010778	16.75762766	0.26205238	20.92173797	0.26493463
0.008798	0.008861	0.001134	0.517049312	0.054144267	1.579498397	0.06922549	2.79291434	0.10647367	4.546337313	0.11882552	7.892423409	0.16996883	11.02285476	0.20017372	13.64375324	0.19438156	16.80285366	0.21959328	21.02981797	0.27431643
0.009207	0.009267	0.001141	0.554372602	0.055139599	1.483611097	0.059779747	2.65226584	0.10110981	4.471818713	0.10776862	7.726153309	0.14100266	10.91808076	0.2046113	13.16174024	0.20626654	15.86094266	0.24039925	21.07047297	0.24432109
0.009616	0.009674	0.001148	0.643268232	0.05128548	1.496504397	0.064482643	2.82365734	0.10670847	4.334338813	0.098957265	7.925591809	0.15536777	11.10439176	0.18013715	13.34376024	0.22505593	16.04992566	0.22263727	20.50152997	0.27526877
0.01003	0.01008	0.001155	0.598490962	0.049579847	1.526811697	0.067684491	2.78085584	0.092319059	4.327621913	0.10364703	7.580764309	0.14161199	10.83650876	0.20065349	13.46312024	0.20930443	16.27900166	0.23184631	20.31966197	0.24908322
0.01043	0.01049	0.001163	0.529549832	0.046776121	1.529563197	0.060015042	2.67129074	0.091335694	4.251795313	0.1107528	7.471744609	0.14726977	10.74272576	0.20186913	12.66400224	0.19796735	16.04938066	0.21622711	20.13803497	0.2307019
0.01084	0.01089	0.001171	0.531993702	0.049487673	1.455866897	0.057894775	2.86094914	0.092395826	4.272607413	0.095433976	7.588492509	0.14409275	10.38357276	0.1822707	12.67981524	0.18544482	15.67431166	0.20433941	20.27339597	0.2359887
0.01125	0.0113	0.00118	0.467247182	0.043983008	1.557059697	0.057302787	2.91898744	0.087170563	4.137490013	0.1020995	7.618233609	0.13867736	10.88326876	0.16469999	12.81851924	0.17639693	15.68481666	0.19394554	20.18160597	0.24842329
0.01166	0.01171	0.001188	0.502538562	0.043056923	1.548055697	0.056029768	2.79871534	0.08466751	4.117600613	0.096646281	7.666919409	0.13696335	10.72219576	0.16469585	12.61746824	0.19260109	15.27417266	0.19260534	19.54707497	0.23638992
0.01207	0.01212	0.001197	0.488967382	0.043286783	1.457513397	0.054681147	2.76002054	0.084367514	4.034641313	0.096667966	7.349364009	0.13204818	10.29608676	0.16964351	12.67317524	0.18139584	15.54466766	0.19713335	19.52668097	0.23246626
0.01248	0.01252	0.001206	0.504043472	0.045261625	1.452267297	0.0505211	2.65658234	0.087761773	3.999157513	0.092075198	7.290866109	0.12503666	10.18143276	0.16313902	12.60405824	0.16932457	15.41156566	0.18894488	19.67638797	0.23186877
0.01289	0.01293	0.001215	0.503141392	0.044008136	1.360409897	0.052232174	2.55520114	0.081465187	4.091257913	0.096413364	7.411717109	0.12184211	10.51993576	0.17648624	12.38756824	0.17840147	15.47821766	0.20404068	19.40647897	0.19775359
0.0133	0.01334	0.001225	0.485642722	0.038525024	1.379398097	0.046049566	2.65101554	0.079112134	4.166597413	0.086229107	7.304188809	0.13206854	10.13737476	0.16633298	12.08025124	0.16381707	14.95173566	0.18247556	19.08450297	0.2072218
0.01371	0.01375	0.001235	0.435619622	0.040553351	1.398880597	0.0487366	2.54554244	0.075913585	3.844339713	0.080146193	7.274446409	0.11956195	10.16506376	0.16935652	12.20264624	0.16307135	15.52473066	0.1880234	19.24064597	0.19418779
0.01412	0.01416	0.001245	0.442725842	0.038979489	1.355318797	0.048482263	2.60778694	0.079913013	4.000478513	0.082818655	7.143362909	0.11734202	10.21263676	0.15044247	11.84302124	0.16290469	15.03970666	0.15727639	18.88311297	0.19244982
0.01453	0.01456	0.001255	0.482544422	0.038617153	1.265124697	0.046486561	2.58011874	0.078494341	3.924112813	0.080899265	7.129723209	0.11363321	10.04414376	0.15645551	11.66744324	0.14448348	14.93073866	0.17715593	18.77453697	0.18042981
0.01494	0.01497	0.001266	0.434634602	0.03936622	1.367200197	0.046794174	2.59579794	0.076010569	3.967846613	0.08556049	7.131445309	0.1140307	10.00353276	0.14953681	12.08385324	0.15856779	14.78259966	0.18158376	18.35311397	0.19991843
0.01534	0.01538	0.001276	0.485524592	0.03783601	1.340954097	0.045949793	2.52031084	0.069251658	3.926801713	0.083302516	6.825791509	0.11663744	9.788660759	0.14123939	11.43111324	0.16205334	14.59928166	0.15727147	18.22359297	0.17616103
0.01575	0.01579	0.001287	0.465716112	0.036508175	1.217540897	0.045590858	2.48370014	0.073449329	3.936977513	0.083081964	7.052213409	0.1185751	9.657339259	0.15048406	11.64850124	0.14835555	14.53973566	0.17150613	18.06329997	0.17103547
0.01616	0.0162	0.001298	0.437583732	0.036096999	1.247126997	0.044632085	2.49173914	0.074309794	3.685384113	0.074026421	6.887563409	0.10595705	9.581614659	0.14805583	11.50826924	0.14765043	14.04564866	0.16930329	17.81847097	0.17934257
0.01657	0.0166	0.00131	0.433757142	0.034330637	1.295722097	0.045068665	2.47371724	0.065540176	3.730588213	0.084118225	6.888754609	0.10352337	9.416371459	0.14810418	11.38707924	0.15166195	14.02709266	0.16970293	17.67662297	0.18500459
0.01698	0.01701	0.001321	0.445134282	0.032714338	1.325316997	0.043479088	2.43426204	0.066427573	3.670315813	0.075131595	7.054922909	0.11318284	9.334304059	0.14587608	11.26893524	0.13372556	13.82191066	0.17081868	17.56110897	0.1802387
0.01739	0.01742	0.001333	0.383582602	0.033707951	1.178376197	0.044842571	2.38535974	0.067755362	3.602372713	0.070006071	6.787904809	0.10293679	9.375552559	0.13402424	11.11348024	0.13223725	13.67234766	0.15169737	17.14938397	0.15826457
0.0178	0.01783	0.001344	0.448552182	0.033411006	1.266193597	0.042620209	2.36528024	0.067773624	3.729047713	0.067750607	6.414159509	0.10824247	9.287145359	0.12769331	11.15459224	0.13644352	13.47141766	0.14854554	17.23210897	0.1603394
0.01821	0.01824	0.001356	0.441915792	0.033299698	1.216027897	0.043535777	2.37077124	0.063456389	3.512359313	0.077704592	6.397595709	0.1023201	8.987450159	0.13677986	10.89207724	0.13803403	13.53456766	0.14398123	17.22911397	0.16261344
0.01862	0.01865	0.001369	0.448490012	0.031067275	1.226753597	0.039645303	2.33013594	0.061799877	3.560420413	0.073223829	6.345657009	0.092125337	8.720701559	0.12171016	10.69111924	0.12335251	13.43772266	0.15043088	16.84001697	0.15936426
0.01903	0.01906	0.001381	0.398885112	0.032193234	1.198277397	0.041619196	2.27710154	0.062860272	3.447526013	0.068293268	6.078439709	0.09541073	8.940804259	0.13210838	10.60397924	0.12304594	13.14516966	0.14389924	16.71863097	0.16019864
0.01944	0.01946	0.001393	0.414932232	0.033212987	1.085594797	0.039885426	2.24427724	0.065481648	3.551429213	0.066385183	6.229073909	0.096203439	8.800423459	0.12772461	10.24806724	0.12314753	12.88929466	0.13520923	16.50332797	0.14706513
0.01984	0.01987	0.001406	0.395711772	0.035021808	1.143289997	0.04112204	2.25076164	0.061362953	3.414094713	0.070749514	6.220396609	0.099778246	8.660389059	0.13027187	10.21241924	0.12934984	13.08900566	0.14965076	16.18508997	0.1703371
0.02025	0.02028	0.001419	0.370834312	0.029961213	1.082687797	0.037618645	2.20066904	0.062422999	3.362304913	0.066218749	6.200570209	0.087927716	8.567489359	0.12470748	10.29623224	0.131857	12.86390366	0.13369235	15.72158497	0.16701802
0.02066	0.02069	0.001432	0.346675602	0.030856699	1.081939897	0.038880033	2.13245324	0.056701135	3.182568313	0.063251213	5.953501809	0.086234325	8.342969859	0.12511055	9.811990544	0.12641772	12.57499866	0.13422493	16.02622897	0.16084474
0.02107	0.0211	0.001445	0.398872182	0.031141259	1.160418897	0.039292015	2.06463344	0.056262197	3.296839113	0.062626684	5.991862609	0.091623804	8.518281559	0.11305171	10.13453724	0.11633214	12.31618366	0.12643125	15.76431397	0.1508207
0.02148	0.02151	0.001458	0.348529362	0.030258945	1.029533197	0.037939732	2.14882094	0.058679551	3.252897113	0.060081982	5.843474609	0.09715756	8.149442759	0.11607194	9.820473144	0.12748486	12.58560666	0.14528798	15.60818397	0.15966715
0.02189	0.02191	0.001471	0.317231002	0.031942306	1.058005297	0.037759384	2.12001054	0.060338352	3.127661313	0.061363818	5.513956609	0.087237053	7.950881059	0.10871206	9.457916144	0.11783546	12.14910766	0.12765245	15.16312597	0.1549427
0.0223	0.02232	0.001485	0.358746872	0.031047365	1.038817797	0.036255778	1.99429504	0.057614057	3.200257013	0.062453013	5.593328509	0.090418489	8.178093159	0.11645396	9.691321344	0.11666202	11.98584666	0.13288337	14.91616297	0.14016934
0.02271	0.02273	0.001498	0.366756532	0.028800299	0.997519997	0.035089765	1.96584104	0.058065044	3.079835613	0.058137939	5.599477409	0.085760145	7.902754359	0.11562031	9.523053244	0.10790176	11.85327666	0.12606968	14.75314197	0.12323295
0.02312	0.02314	0.001512	0.320514902	0.030211756	0.973055797	0.034929991	2.03141204	0.055295109	2.992258213	0.060576561	5.582394909	0.086340396	7.743485659	0.10240022	9.496492744	0.10939054	11.43778866	0.12560034	14.51254497	0.13391152
0.02353	0.02355	0.001526	0.357128982	0.029331911	0.994629697	0.033362884	1.94917574	0.051625195	3.058981613	0.0632412	5.225848209	0.0772692	7.475625659	0.097799122	9.169850044	0.11179824	11.42876766	0.11794971	14.27336997	0.12821832
0.02393	0.02396	0.00154	0.327892632	0.028365009	0.963513877	0.034280844	1.94639574	0.054994677	2.982447313	0.057412788	5.425557409	0.082553205	7.638637359	0.10224924	9.173526744	0.10974739	11.07752366	0.1252862	14.07425297	0.13371402
0.02434	0.02437	0.001554	0.297362472	0.0314814	0.946752777	0.034506583	1.82786214	0.049537788	3.050240513	0.060157681	5.215600209	0.083322713	7.274485159	0.10379593	8.998465344	0.11232954	10.94230666	0.12244217	13.85183997	0.13338968
0.0246	0.02469	0.002401	0.300479062	0.013240512	0.941319647	0.016764324	1.82307664	0.023353686	2.869888413	0.027160892	5.180969809	0.037324159	7.318869359	0.050046849	8.803201144	0.053437275	11.11008666	0.060938401	13.86164397	0.065506492
0.02475	0.02477	0.001568	0.245642202	0.028958281	0.933418287	0.034943109	1.74751824	0.055353913	2.917506513	0.060911314	5.081067809	0.081136999	7.495434459	0.10249004	8.702028144	0.10640774	10.88023766	0.12578004	13.66228097	0.13230924
0.02516	0.02518	0.001582	0.241291822	0.032689071	0.864791027	0.037526185	1.72021944	0.055176102	2.849339913	0.062669943	5.029336809	0.088039236	7.197753059	0.10880717	8.405590944	0.12461477	10.64363466	0.12171525	13.40317697	0.13967977
0.02557	0.02559	0.001597	0.302636432	0.030439733	0.917675207	0.03623388	1.78157634	0.057409159	2.791806813	0.062304124	4.940715709	0.085474064	6.847326759	0.11713935	8.429067044	0.10738424	10.65757066	0.14148144	13.25584197	0.13319506
0.02593	0.02601	0.002431	0.272283302	0.013307921	0.888002497	0.016282073	1.75483934	0.022449431	2.695763313	0.023534247	4.935695709	0.030917385	6.962808559	0.048720277	8.380798344	0.046283563	10.50107066	0.052450572	13.30847597	0.059027971
0.02726	0.02734	0.002463	0.257569662	0.01178939	0.852311227	0.016722474	1.62730724	0.021097949	2.556972613	0.021709993	4.635094209	0.032423462	6.579621059	0.044720091	7.870259244	0.043318245	9.980342857	0.051044223	12.51786997	0.058579509
0.02859	0.02866	0.002495	0.231577512	0.01213375	0.732446227	0.015829868	1.51484904	0.018943016	2.390761513	0.023910604	4.386542909	0.031601376	6.197296859	0.044057962	7.455541344	0.04091386	9.429342657	0.055014639	11.88063497	0.054587846
0.02991	0.02999	0.002529	0.214519722	0.01218824	0.697254427	0.015305515	1.40240724	0.020667578	2.226397513	0.021303943	4.114311009	0.031035906	5.811042659	0.040587383	7.111767744	0.044914185	8.834161757	0.04441871	11.24352597	0.055385466
0.03124	0.03131	0.002564	0.201993522	0.012644535	0.667842807	0.013606121	1.30906734	0.01895059	2.091836213	0.020555578	3.812507009	0.030662721	5.416206159	0.037942451	6.579871744	0.042320755	8.341750157	0.049663231	10.56998397	0.047467428
0.03257	0.03264	0.0026	0.191364052	0.01114304	0.598872577	0.013103064	1.21405344	0.016968948	1.944261413	0.019447499	3.615311409	0.025303725	5.083639559	0.034411066	6.260698944	0.03563188	7.829339057	0.045891727	9.821420769	0.047760132
0.0339	0.03397	0.002637	0.158304202	0.011279327	0.550199757	0.014558852	1.09834964	0.016532503	1.809336913	0.017690429	3.307279409	0.026720677	4.695628359	0.033774807	5.776871944	0.036438079	7.299089257	0.042839046	9.273926569	0.044323931
0.03523	0.03529	0.002675	0.157643322	0.011127195	0.478146947	0.012959095	1.04906884	0.01697557	1.644010613	0.018135416	3.094093109	0.026573594	4.407825559	0.033119169	5.443982444	0.036985474	6.757291657	0.042177357	8.615358169	0.041482041
0.03656	0.03662	0.002714	0.120155962	0.01050917	0.447887707	0.012137043	0.93747564	0.014538839	1.549259213	0.017294435	2.770991509	0.021969712	4.058540359	0.031459264	4.972016544	0.03104785	6.265603157	0.0384241	7.874049069	0.039353343
0.03788	0.03794	0.002754	0.109299072	0.010341365	0.402770187	0.013112196	0.85048664	0.015700096	1.370638813	0.016857918	2.593548309	0.024244919	3.671792759	0.030315923	4.593463544	0.032045239	5.771502957	0.032699779	7.342553069	0.04005522
0.03921	0.03927	0.002794	0.098558012	0.008727309	0.360309367	0.011235159	0.75249474	0.015073428	1.245449413	0.015541427	2.367786709	0.023350764	3.387314659	0.025284032	4.231296344	0.028943595	5.314801157	0.033708998	6.746447369	0.035355027
0.04054	0.04059	0.002835	0.076151192	0.009564416	0.308104607	0.012127082	0.68505624	0.014564945	1.146197613	0.014590594	2.153621109	0.020439728	3.047175459	0.026812742	3.833983144	0.029231185	4.853601957	0.034255567	6.155200269	0.037981059
0.04187	0.04192	0.002878	0.099226342	0.009201635	0.296166007	0.011041909	0.62651104	0.013713272	1.032205713	0.014352731	1.942699209	0.018709002	2.809173059	0.025450634	3.513621744	0.028832708	4.427831557	0.030354041	5.592996469	0.030081649
0.0432	0.04325	0.00292	0.078892222	0.009299853	0.241273047	0.0108093	0.53705714	0.01251537	0.921619513	0.012978876	1.728594609	0.018400749	2.566679459	0.026033171	3.075828244	0.024649998	3.995830157	0.026761978	5.080018969	0.031929074
0.04452	0.04457	0.002964	0.066559132	0.009157189	0.220200067	0.010631635	0.47627334	0.012937603	0.814217813	0.013570864	1.534012509	0.016938841	2.270279559	0.024695278	2.784889944	0.023496238	3.617769957	0.026255408	4.573802369	0.029308977
0.04585	0.0459	0.003008	0.048197932	0.008946074	0.159651217	0.009841588	0.4263527	0.0122061	0.719610113	0.013207172	1.383002909	0.017548114	2.018703159	0.021837846	2.555111644	0.022839127	3.233774957	0.02517533	4.156120169	0.026796113
0.04718	0.04722	0.003053	0.064585152	0.00907897	0.153419607	0.010192131	0.37236248	0.011622253	0.634245313	0.012742657	1.214012509	0.016767317	1.832036259	0.020843986	2.269150644	0.021860707	2.946268957	0.021924982	3.710876769	0.025169585
0.0485	0.04855	0.003098	0.047372922	0.008518412	0.123549567	0.009109955	0.30709046	0.011487822	0.552410113	0.010778755	1.085286609	0.013988617	1.602461859	0.02090653	2.008770844	0.018862522	2.561720457	0.020049557	3.327330169	0.023317533
0.04983	0.04987	0.003144	0.048413542	0.008454711	0.100909687	0.009663349	0.2651155	0.010923515	0.477602413	0.011922451	0.927776169	0.01409773	1.415065659	0.018904743	1.725561544	0.018499018	2.265026857	0.020652314	2.904312169	0.021511167
0.05116	0.0512	0.003191	0.043192152	0.008442732	0.094751767	0.009301778	0.23492472	0.011200309	0.418032673	0.010893775	0.815560329	0.014002366	1.220183959	0.017516135	1.535236744	0.016784153	1.993917757	0.018773985	2.557127669	0.021314588
0.05248	0.05253	0.003238	0.033665562	0.009029524	0.073312177	0.009584492	0.20714706	0.01086951	0.357784053	0.01045247	0.707652009	0.012872004	1.052670959	0.016428332	1.330260644	0.016534487	1.745687557	0.019098717	2.228925869	0.020139349
0.05381	0.05385	0.003285	0.033520722	0.00828406	0.080724467	0.009544718	0.17727478	0.010924785	0.289181853	0.010516071	0.582090409	0.012187229	0.880787439	0.016047821	1.148513444	0.015286163	1.504102357	0.017497606	1.907536069	0.017624791
0.05514	0.05518	0.003333	0.040718242	0.008108932	0.057695881	0.008755357	0.12816852	0.010168292	0.245628233	0.009871628	0.510121369	0.01179951	0.767291279	0.01497005	1.002607544	0.015340744	1.296746457	0.015221171	1.651730969	0.015400397
0.05646	0.0565	0.003382	0.048850152	0.008441312	0.048778121	0.009015789	0.09419074	0.010221107	0.201960053	0.009769448	0.414596249	0.012236412	0.651045119	0.014034593	0.812201844	0.013465786	1.094288957	0.014573592	1.399904269	0.015617312
0.05779	0.05782	0.003431	0.045453632	0.007771852	0.052090612	0.008358397	0.08536364	0.009875122	0.150003913	0.009199763	0.348846169	0.011685903	0.547049839	0.012860747	0.709008324	0.012351212	0.914920657	0.013138986	1.205631469	0.013462407
0.05911	0.05915	0.00348	0.041646242	0.007599233	0.048577647	0.008357183	0.07644716	0.009666993	0.124768653	0.008994402	0.295092969	0.01055509	0.456962719	0.012666367	0.562617324	0.011903139	0.771913277	0.012990529	1.015700469	0.012437894
0.06044	0.06047	0.00353	0.045807692	0.007965811	0.052496727	0.008736532	0.06461236	0.009154327	0.108004073	0.009440781	0.244739849	0.010814216	0.342956079	0.011820144	0.475179404	0.011221169	0.657058717	0.011342159	0.844211139	0.011825848
0.06176	0.0618	0.00358	0.065072212	0.00790709	0.048171531	0.008742664	0.05709068	0.00965581	0.107605793	0.008756633	0.199677849	0.010496376	0.288012879	0.011978821	0.374419084	0.010916622	0.510382307	0.011568221	0.676735369	0.010882749
0.06309	0.06312	0.00363	0.067901242	0.007610038	0.040304701	0.008690519	0.06041888	0.009516528	0.083298613	0.008685722	0.158532649	0.011155404	0.243446879	0.011659765	0.316240204	0.01028438	0.440800587	0.010319045	0.559790549	0.010493803
0.06441	0.06444	0.003681	0.065774912	0.007413165	0.063875744	0.007737369	0.04743536	0.009192719	0.069775673	0.008429521	0.142763369	0.01002682	0.199883439	0.010859583	0.260824904	0.009563331	0.346989297	0.009724654	0.455529829	0.009153125
0.06574	0.06577	0.003732	0.071032762	0.007644793	0.052409728	0.007951003	0.05581298	0.008873245	0.075364233	0.008589952	0.107199609	0.009505022	0.161376799	0.010924665	0.205304944	0.010108489	0.284936567	0.009525407	0.375477839	0.008178076
0.06706	0.06709	0.003784	0.089521662	0.007194182	0.055301096	0.008105332	0.06797336	0.009489906	0.054164333	0.008501312	0.093266489	0.009494479	0.126098239	0.010534689	0.165607624	0.009003093	0.224570287	0.008811459	0.297447889	0.008213106
0.06838	0.06841	0.003836	0.071667902	0.007573802	0.053117262	0.008603399	0.05328982	0.008563564	0.059345573	0.008432373	0.083803689	0.009587456	0.106945359	0.010519297	0.142702324	0.009099678	0.197489217	0.008899018	0.252791509	0.008072417
0.06971	0.06974	0.003888	0.081594672	0.007353326	0.065357565	0.007946915	0.05837772	0.008991548	0.036570113	0.008418874	0.083803689	0.009093452	0.111244559	0.010104971	0.115714424	0.008948637	0.152306527	0.008435718	0.197680569	0.007930023
0.07103	0.07106	0.00394	0.090458262	0.006753799	0.070629917	0.008006668	0.05970804	0.008783033	0.063655313	0.008325503	0.074905049	0.008775685	0.095616639	0.010070574	0.115171604	0.008170802	0.131898367	0.007844553	0.156970209	0.007058708
0.07235	0.07238	0.003993	0.097095742	0.007234895	0.071256397	0.008199437	0.07105178	0.008917314	0.070343653	0.008553889	0.081980089	0.009396051	0.092285279	0.010171354	0.086384964	0.008745402	0.120919137	0.00840662	0.142221349	0.007264755
0.07367	0.0737	0.004045	0.099182372	0.006894263	0.083731647	0.007832525	0.08523776	0.008572863	0.076167293	0.007927209	0.081630249	0.009115975	0.109450719	0.009491381	0.100040004	0.008388235	0.107129197	0.00742305	0.121644099	0.00651524
0.075	0.07503	0.004099	0.090816592	0.00743545	0.084025067	0.008006657	0.07790052	0.008728604	0.085706073	0.008124984	0.099401849	0.009333349	0.090944559	0.009553231	0.096975444	0.008329861	0.113042537	0.007974206	0.118242639	0.006860129
0.07632	0.07635	0.004152	0.095728982	0.00691799	0.086651687	0.007744705	0.08194804	0.008681304	0.077501853	0.0085329	0.088103769	0.009057635	0.099462719	0.009697219	0.105499024	0.008171579	0.107605507	0.007744617	0.123545349	0.006161147
0.07764	0.07767	0.004206	0.095814832	0.006978638	0.084695437	0.007431001	0.0921855	0.008284696	0.090252853	0.007663764	0.120789449	0.00845991	0.115005439	0.009004099	0.099790524	0.008441324	0.111494477	0.007570029	0.129457849	0.006170292
0.07896	0.07899	0.004259	0.099698382	0.007173781	0.105635477	0.007985151	0.10196104	0.009266283	0.104164733	0.008383716	0.123021849	0.009567982	0.097971439	0.010416279	0.106041564	0.008822378	0.125796157	0.007662758	0.137464909	0.007173994
0.08028	0.08031	0.004313	0.094729152	0.006659961	0.105601637	0.008071343	0.09839072	0.008752487	0.102515913	0.008203854	0.136423929	0.008610569	0.139595439	0.010084017	0.126407584	0.008727152	0.144693837	0.008043162	0.151343519	0.006352161
0.08161	0.08163	0.004368	0.091126622	0.007222491	0.101991477	0.008369792	0.11080794	0.009411393	0.100199813	0.008552789	0.139694169	0.009670941	0.151180639	0.010652995	0.142604164	0.008823381	0.151146807	0.008515209	0.165864719	0.007110356
0.08293	0.08295	0.004422	0.101986722	0.00776987	0.103864197	0.008424525	0.10679974	0.009088995	0.109641293	0.008746512	0.157110969	0.009196801	0.155235759	0.010190517	0.147599004	0.009285377	0.169093927	0.008477419	0.185375569	0.007384638
0.08425	0.08427	0.004477	0.091872232	0.008346506	0.103295687	0.008594566	0.10515686	0.009585503	0.113935193	0.009862976	0.146233049	0.010556312	0.149785919	0.01179609	0.173635344	0.010000341	0.178017597	0.009899986	0.192111349	0.008302317
0.08557	0.08559	0.004531	0.100558822	0.009299144	0.095108967	0.010007446	0.12581734	0.011369657	0.115362253	0.010733615	0.138622009	0.011933554	0.157792159	0.012995545	0.195991604	0.010840586	0.195657927	0.010462553	0.205465119	0.009597023
0.08689	0.08691	0.004586	0.104874742	0.008983316	0.118072497	0.009644561	0.1104835	0.010818565	0.118758893	0.010032602	0.160560649	0.011377612	0.179093839	0.013158853	0.174352404	0.010747116	0.202342617	0.010218005	0.228041009	0.008773775
0.08754	0.08774	0.007211	0.087516552	0.002833672	0.103286277	0.003185745	0.11034262	0.003072628	0.118035313	0.00289049	0.154643849	0.003361799	0.176027119	0.004305706	0.173315984	0.003839334	0.194574367	0.003537945	0.219722829	0.003453405
0.08821	0.08823	0.004641	0.105678282	0.008997963	0.105401797	0.010853862	0.11957252	0.011280244	0.113016733	0.010800428	0.157470409	0.012373121	0.212716559	0.013599776	0.195008364	0.011318107	0.199272237	0.01063743	0.243958379	0.009728001
0.08953	0.08955	0.004697	0.089122602	0.009465174	0.120473867	0.010518062	0.12803274	0.011521306	0.132054973	0.011612343	0.183761369	0.012725812	0.214599999	0.014359364	0.216053824	0.011429536	0.236056927	0.011859768	0.248047939	0.009761094
0.09282	0.09301	0.007353	0.078746292	0.002726606	0.098229127	0.002973506	0.10755074	0.00314506	0.123425313	0.002713352	0.162954409	0.003108959	0.182044159	0.004237285	0.195624724	0.003495134	0.214122147	0.003251701	0.247043799	0.003214885
0.09809	0.09827	0.0075	0.068932172	0.00263642	0.084909357	0.002820728	0.10096026	0.00293985	0.112962973	0.002799913	0.156250089	0.00322919	0.180938319	0.003792499	0.194596224	0.003334727	0.216292447	0.003250957	0.252603339	0.003055841
0.1034	0.1035	0.007652	0.059615832	0.002580808	0.072729087	0.002578581	0.08694796	0.002982279	0.100652673	0.002881976	0.140511449	0.003076296	0.165795199	0.003715905	0.177515684	0.003479903	0.203226617	0.003270741	0.235360399	0.002619721
0.1086	0.1088	0.007809	0.051591182	0.002433541	0.061889551	0.002594704	0.069739	0.002618054	0.080934133	0.002786464	0.121899529	0.003066554	0.139285439	0.003596619	0.151066644	0.003461023	0.171881107	0.003243505	0.197538079	0.002917905
0.1139	0.114	0.00797	0.045820502	0.002306096	0.054257032	0.00274425	0.05693114	0.002666918	0.069743413	0.002757855	0.092608249	0.003199839	0.113243839	0.003514582	0.116411964	0.003239458	0.136194967	0.00298783	0.159842129	0.002589917
0.1191	0.1193	0.008135	0.038823602	0.002373667	0.042847435	0.002616325	0.05054602	0.002823575	0.058130093	0.002626697	0.071664729	0.002870051	0.084964879	0.003473664	0.093913704	0.003272677	0.107950937	0.002726553	0.122711979	0.002516095
0.1244	0.1245	0.008304	0.041808162	0.002381634	0.045479221	0.002576822	0.04346392	0.002806648	0.052343233	0.002726197	0.065773449	0.002878762	0.075711439	0.003638846	0.075577524	0.002986794	0.084032517	0.003072757	0.094572242	0.002222633
0.1296	0.1297	0.008477	0.037590932	0.002358852	0.045288162	0.002791069	0.03986446	0.002800759	0.045936053	0.002462437	0.058475209	0.002846578	0.059479839	0.00369028	0.062548184	0.00274044	0.070203937	0.003067045	0.082039186	0.002279107
0.1348	0.1349	0.008652	0.040539032	0.002259137	0.046346455	0.002655273	0.04545416	0.002674984	0.044881813	0.00258072	0.060834089	0.002970583	0.057428639	0.003701922	0.063646264	0.002967365	0.068645127	0.002666212	0.077082984	0.002472934
0.14	0.1401	0.008831	0.048887672	0.002422794	0.047624971	0.00264587	0.0440305	0.002691497	0.049610473	0.002526802	0.067336649	0.002945846	0.068238719	0.003526756	0.063657864	0.003023748	0.069639627	0.002796346	0.081342921	0.00227862
0.1452	0.1454	0.009013	0.046887952	0.002484258	0.049829334	0.002662187	0.05336364	0.002689616	0.056491453	0.002534552	0.067184489	0.00264924	0.071377519	0.003243559	0.068053024	0.003117088	0.075123867	0.002563548	0.083935059	0.002247476
0.1504	0.1505	0.009197	0.044072882	0.002335845	0.045865586	0.002605756	0.053498	0.00254286	0.053802253	0.002566661	0.069870889	0.002772247	0.066490239	0.00335759	0.071141064	0.002807979	0.077945357	0.002536467	0.087916705	0.002378778
0.1556	0.1557	0.009383	0.044090052	0.002366354	0.047890641	0.002576201	0.05091544	0.002658084	0.052783373	0.00235323	0.061078889	0.003007576	0.073255839	0.003200317	0.072286104	0.002705004	0.081837537	0.002616675	0.085093486	0.002086762
0.1608	0.1609	0.009572	0.040431742	0.002248923	0.047227634	0.002615885	0.04696664	0.002583223	0.050347053	0.002494122	0.063450169	0.002802659	0.064659039	0.003514924	0.065132724	0.002861624	0.072091007	0.002698074	0.082792509	0.00229292
0.166	0.1661	0.009762	0.039064982	0.002169456	0.044122341	0.002603263	0.04227532	0.002633326	0.045507793	0.002436132	0.057180009	0.002536208	0.068289199	0.003248062	0.058711964	0.003068649	0.072502967	0.002426332	0.077664231	0.002155265
0.1712	0.1713	0.009955	0.037156442	0.002257243	0.040594794	0.002691359	0.04311854	0.002779692	0.049140913	0.002275698	0.060089769	0.002622269	0.060579119	0.003333193	0.059227624	0.002963036	0.068472397	0.002539931	0.071856655	0.00198006
0.1763	0.1764	0.01015	0.034848812	0.002116102	0.039980064	0.002248919	0.0418629	0.002351395	0.042688473	0.002207623	0.054164489	0.002589975	0.055069039	0.003054124	0.059263264	0.002578704	0.062304777	0.002276267	0.066929536	0.002019935
0.1815	0.1815	0.01034	0.036820642	0.002130802	0.03949778	0.002450139	0.03692888	0.00253055	0.038777293	0.002434782	0.047279849	0.002736724	0.048593759	0.003076481	0.051041784	0.002594756	0.050741977	0.002446223	0.059468318	0.001956024
0.1866	0.1867	0.01054	0.033073302	0.002188641	0.038991357	0.002432556	0.03855988	0.002355247	0.040252153	0.002174589	0.046649609	0.002483427	0.049422559	0.003197907	0.047574704	0.002689416	0.048270217	0.002336616	0.054143187	0.002011088
0.1917	0.1918	0.01074	0.035803612	0.002109857	0.033165722	0.002375878	0.03124046	0.002458286	0.035703113	0.002258084	0.043457849	0.002704226	0.050502719	0.003026499	0.047414884	0.002547783	0.048657497	0.002559244	0.053460449	0.002026449
0.1968	0.1969	0.01094	0.032048762	0.002057794	0.03842271	0.002557061	0.03457544	0.002345078	0.036595553	0.00227846	0.043796169	0.002638698	0.043502239	0.002981111	0.045961804	0.002484668	0.046593397	0.002336034	0.048022559	0.002025924
0.2019	0.202	0.01114	0.032250442	0.002071649	0.038634935	0.002247394	0.03762416	0.002400451	0.034925233	0.002251437	0.048065609	0.002709163	0.045728799	0.003159202	0.044970644	0.002641107	0.051024117	0.00236732	0.051466186	0.001854145
0.207	0.2071	0.01134	0.035934492	0.002074887	0.036246875	0.002547169	0.03469792	0.002316473	0.037482053	0.00216789	0.046482569	0.002368258	0.043232639	0.00294527	0.041831124	0.002549153	0.050086487	0.002213627	0.053136026	0.001743559
0.2121	0.2122	0.01155	0.034625662	0.002036483	0.035425725	0.00236666	0.03940508	0.002511887	0.037499873	0.002253773	0.045056649	0.002376078	0.043772719	0.002981832	0.044342684	0.002559886	0.048870987	0.002285122	0.052853014	0.001829989
0.2172	0.2173	0.01175	0.035248962	0.001999433	0.034968358	0.002250988	0.03404252	0.002315977	0.036652973	0.002319924	0.042476169	0.002450579	0.049005759	0.002659019	0.046872064	0.002448769	0.047306817	0.002267165	0.051494512	0.001726493
0.2222	0.2223	0.01195	0.036874272	0.002151919	0.035330585	0.002370521	0.03493496	0.002387359	0.041527873	0.002280154	0.044997129	0.002476689	0.043975359	0.003114148	0.042915344	0.002481516	0.044338337	0.002284455	0.050894378	0.001880078
0.2273	0.2274	0.01216	0.031986532	0.002193606	0.03549892	0.002398324	0.03800122	0.0023144	0.039182353	0.002324267	0.042163529	0.002594585	0.044213599	0.002911195	0.043029904	0.002490021	0.045879977	0.002132428	0.047839754	0.001926444
0.2323	0.2324	0.01237	0.032478952	0.002133716	0.033429976	0.002229068	0.0352826	0.002389103	0.035314453	0.00216713	0.040915449	0.002326256	0.036312399	0.002937855	0.039262704	0.002420379	0.044896197	0.002126436	0.044451692	0.001732377
0.2374	0.2374	0.01257	0.034641742	0.002080142	0.033452699	0.002328664	0.02810546	0.002308779	0.038098413	0.002207434	0.041796329	0.00250115	0.036519999	0.003120637	0.039608084	0.002479454	0.043276247	0.002297885	0.043283184	0.001944339
0.2424	0.2424	0.01278	0.031077852	0.002034489	0.034535131	0.002164185	0.02943436	0.002335714	0.032643073	0.002066478	0.040278649	0.002385857	0.039664639	0.003029056	0.039786004	0.0025745	0.038193247	0.002108539	0.042480822	0.00187359
0.2474	0.2474	0.01299	0.030517842	0.002005896	0.03333342	0.002284411	0.03504386	0.002335506	0.030273793	0.002027462	0.038370569	0.002348447	0.038174239	0.002861328	0.035305984	0.002434523	0.037444427	0.002106463	0.04164349	0.001742807
0.2524	0.2524	0.01319	0.033652602	0.001949622	0.030414019	0.002277926	0.03105546	0.002124255	0.032880113	0.002088918	0.039726169	0.002358707	0.038469519	0.002774674	0.038652564	0.002239633	0.040463327	0.002210778	0.042006208	0.001824148
0.2573	0.2574	0.0134	0.029895602	0.001993004	0.031824345	0.002171652	0.03260358	0.00220824	0.034623693	0.002023983	0.037100169	0.002303675	0.033337439	0.002902317	0.032162784	0.002372387	0.038088107	0.002118979	0.040912149	0.001612421
0.2623	0.2623	0.01361	0.029742192	0.001908679	0.031249115	0.002213782	0.03221662	0.002145232	0.030311413	0.001965399	0.036162249	0.002271268	0.037301679	0.002577964	0.039245164	0.002443275	0.038723217	0.002012427	0.040200658	0.001764871
0.2672	0.2673	0.01382	0.030124112	0.002028953	0.033624008	0.002212864	0.02998934	0.002220069	0.034831033	0.00209582	0.037918169	0.00241262	0.033274559	0.002709436	0.037405124	0.00245677	0.033675617	0.002169525	0.038215628	0.001741302
0.2722	0.2722	0.01403	0.029785102	0.001969686	0.032008042	0.002090904	0.03214166	0.002190424	0.032051033	0.002040351	0.035905049	0.002241616	0.038472879	0.002719472	0.034970504	0.002394671	0.039323987	0.001958541	0.038990415	0.001540796
0.2771	0.2771	0.01423	0.030696992	0.001885194	0.029644899	0.002132715	0.03215156	0.002130591	0.030996793	0.002003024	0.035540329	0.002224524	0.037539919	0.002486002	0.032690044	0.002355128	0.037726567	0.002075137	0.039303246	0.001663032
0.282	0.282	0.01444	0.030719522	0.001998229	0.030769025	0.002238659	0.03100624	0.002206426	0.033743133	0.002170835	0.037788329	0.002316714	0.033693119	0.002781467	0.032826384	0.002277114	0.042606797	0.002118451	0.036787925	0.00179072
0.2869	0.2869	0.01465	0.030835382	0.001872973	0.030552411	0.002186972	0.03075562	0.002201579	0.031231853	0.001851379	0.035400569	0.002395225	0.039318159	0.002777164	0.033444444	0.002184703	0.041391297	0.001922942	0.035983852	0.001584775
0.2917	0.2918	0.01486	0.027801462	0.001879888	0.034524937	0.002101832	0.02789274	0.002083892	0.032606013	0.001932494	0.035495689	0.002168872	0.037125599	0.00262082	0.030942784	0.002081819	0.037141877	0.001881343	0.040539341	0.001601946
0.2966	0.2967	0.01507	0.030539282	0.001899867	0.027872347	0.002154853	0.02721754	0.002096845	0.034904293	0.001979035	0.036303769	0.002236906	0.035787359	0.002500099	0.030275504	0.002316013	0.033939527	0.00190319	0.037407046	0.001588587
0.3014	0.3015	0.01528	0.031167942	0.001717674	0.029885015	0.002170921	0.02946066	0.002019115	0.034185813	0.001934465	0.035861289	0.00229226	0.030630479	0.00264338	0.032800924	0.002261097	0.035796557	0.002009717	0.035382531	0.001555516
0.3063	0.3063	0.01548	0.031273082	0.001854653	0.033569926	0.002080298	0.02904202	0.002149022	0.030953513	0.001955604	0.034715769	0.002188753	0.033188639	0.002616665	0.032660624	0.002224057	0.034931877	0.002091956	0.035922803	0.001498896
0.3111	0.3111	0.01569	0.032672032	0.002064191	0.031093309	0.002092829	0.03226838	0.002389805	0.032396973	0.00216326	0.031862329	0.002339034	0.030052319	0.002705666	0.035195944	0.002361056	0.037066777	0.002010738	0.034092046	0.00163588
0.3159	0.3159	0.0159	0.028844232	0.001961316	0.034025876	0.002230641	0.0324777	0.00224892	0.029812433	0.002054209	0.034190569	0.002403274	0.033864399	0.002884202	0.032190784	0.002160723	0.035386747	0.002139878	0.035086443	0.001629874
0.3207	0.3207	0.01611	0.029879492	0.001993546	0.033010057	0.002241024	0.03162486	0.002291188	0.029348533	0.002057864	0.035178969	0.002343248	0.031433599	0.00280364	0.033106984	0.002395479	0.034154077	0.002150385	0.034467958	0.001819456
0.3254	0.3255	0.01631	0.031306332	0.002208503	0.030595663	0.002475402	0.03241462	0.002420733	0.031328873	0.0022655	0.030802009	0.002517029	0.030153279	0.003178898	0.030781264	0.002552341	0.031127667	0.002196447	0.034435453	0.0017778
0.3302	0.3302	0.01652	0.031094992	0.002302478	0.030161657	0.002357648	0.0325883	0.002343321	0.028866813	0.002366205	0.032523209	0.002491763	0.035305199	0.00305377	0.029250964	0.002579837	0.032998657	0.002414013	0.033348583	0.00191862
0.3349	0.335	0.01673	0.029690682	0.002111222	0.030152879	0.002527328	0.02711118	0.002486256	0.031546113	0.002226047	0.034341129	0.002663953	0.023872319	0.003010272	0.034100124	0.002624249	0.029833857	0.002324385	0.032071077	0.001912112
0.3396	0.3397	0.01693	0.032197842	0.002066195	0.029947238	0.002369402	0.02875802	0.002645974	0.031463233	0.002340484	0.030562169	0.002713132	0.032446799	0.003117575	0.033533544	0.002711389	0.031509587	0.00245207	0.034270339	0.001968011
0.3444	0.3444	0.01714	0.030108002	0.002252576	0.033954875	0.002779768	0.02363024	0.002456025	0.030191753	0.002289681	0.034909369	0.002757377	0.023144479	0.002997245	0.030190924	0.002589259	0.030511877	0.002428754	0.033192272	0.001867117
0.349	0.3491	0.01734	0.030605782	0.002234228	0.031047225	0.002629468	0.0273898	0.002715289	0.030318193	0.002501332	0.031367769	0.002830156	0.032402159	0.003214148	0.031582904	0.002852611	0.030595547	0.002372631	0.033255783	0.002186173
0.3537	0.3538	0.01755	0.029094182	0.002222513	0.027431121	0.002516665	0.03405552	0.002595888	0.032748853	0.002234645	0.027521849	0.002514761	0.031172319	0.003172533	0.029833664	0.002749239	0.030869117	0.002371839	0.029696932	0.001794936
0.3584	0.3584	0.01775	0.028440842	0.002392369	0.034432133	0.002810049	0.0287088	0.002571024	0.031153493	0.002334835	0.029410089	0.002742073	0.029003679	0.003309931	0.028044824	0.002699528	0.032504087	0.002441577	0.030787342	0.002009586
0.363	0.363	0.01796	0.031622812	0.00226477	0.02972843	0.002646675	0.02883694	0.0027566	0.029810733	0.002449749	0.028829449	0.002310318	0.027825039	0.003222218	0.031932244	0.00307459	0.029120437	0.002523906	0.031975812	0.001902434
0.3676	0.3677	0.01816	0.026770472	0.002424307	0.030622776	0.002634055	0.02078716	0.002769155	0.026847153	0.002636443	0.030643289	0.002955727	0.035974399	0.00340627	0.035751204	0.002822005	0.030987127	0.00254891	0.032503311	0.002134247
0.3722	0.3723	0.01837	0.029369902	0.002724071	0.031408814	0.002818597	0.02582612	0.002625559	0.033570293	0.002606216	0.032514169	0.002893172	0.029743919	0.00319831	0.029203724	0.003022368	0.030397077	0.002635507	0.029881675	0.002121967
0.3768	0.3768	0.01857	0.029362392	0.002553204	0.028925614	0.00270306	0.02900298	0.002517575	0.029850333	0.002539444	0.032611769	0.002988986	0.030689279	0.003157845	0.028362764	0.002950401	0.033614447	0.002646874	0.031601072	0.002073764
0.3814	0.3814	0.01877	0.029463232	0.002371887	0.030563525	0.002653934	0.0292321	0.002607636	0.028409133	0.002327815	0.032989769	0.002743233	0.033842959	0.003206186	0.029815844	0.002876206	0.031966607	0.002583256	0.027841613	0.001796265
0.3859	0.386	0.01897	0.026157892	0.002421002	0.03190646	0.002743576	0.03035564	0.002843927	0.030871193	0.0024479	0.029912969	0.002739124	0.026857359	0.003345395	0.033204004	0.002875739	0.028462797	0.00254368	0.033743909	0.002107978
0.3905	0.3905	0.01917	0.029775412	0.002210162	0.029022949	0.002709819	0.02725968	0.002778731	0.029133833	0.002497154	0.032149449	0.002632466	0.028871359	0.003378967	0.028587924	0.002893625	0.034179817	0.0025794	0.031279447	0.002285257
0.395	0.395	0.01937	0.030948002	0.002448608	0.030922141	0.002697022	0.0287368	0.002796933	0.028206033	0.002746518	0.029858409	0.002708995	0.028878799	0.00319642	0.028058684	0.002899548	0.032979337	0.00283209	0.030727374	0.002000724
0.3995	0.3995	0.01957	0.030423392	0.002213079	0.029957573	0.002613439	0.02875462	0.002712001	0.029039073	0.002509069	0.029779049	0.002854889	0.026677919	0.003141753	0.025576824	0.002643992	0.033245397	0.002596114	0.0289568	0.001865619
0.404	0.404	0.01977	0.029888062	0.002622301	0.027626569	0.002790333	0.0262193	0.002660418	0.028713213	0.00268484	0.030769049	0.003074323	0.028138559	0.003641292	0.030276064	0.002824246	0.031181297	0.002620165	0.02800157	0.002201035
0.4084	0.4085	0.01997	0.026512982	0.002307008	0.028001325	0.002757553	0.02683736	0.002762551	0.030909093	0.00267232	0.030087609	0.003010733	0.030638079	0.003540667	0.029407384	0.002939394	0.034310697	0.00250771	0.030129163	0.002093116
0.4129	0.4129	0.02017	0.026600952	0.002428634	0.030229827	0.002944948	0.02895404	0.002600646	0.029710593	0.002475474	0.030217449	0.00297931	0.034021679	0.003166073	0.029707504	0.002900783	0.028463857	0.002579822	0.026855907	0.001887881
0.4173	0.4173	0.02037	0.026864862	0.002696915	0.029597541	0.002875331	0.02486692	0.002720507	0.027442013	0.002634	0.034861529	0.003027206	0.027909519	0.003382372	0.033492524	0.002765309	0.031542837	0.002651981	0.029123731	0.002152744
0.4217	0.4217	0.02057	0.029469652	0.002458134	0.027468568	0.002697481	0.0286856	0.002630989	0.026063893	0.002423085	0.028248969	0.00273243	0.029705999	0.003544812	0.028937544	0.002914733	0.029602107	0.002637201	0.029318552	0.002113576
0.4261	0.4261	0.02076	0.030424452	0.002281016	0.033256119	0.002603805	0.03116576	0.002809143	0.030486773	0.002577333	0.030560729	0.002840285	0.025243839	0.003551029	0.028596124	0.002986868	0.027096007	0.002657776	0.029980047	0.002234371
0.4305	0.4305	0.02096	0.030298932	0.002363688	0.031434511	0.002864089	0.03362782	0.002934616	0.029084893	0.002612995	0.032676409	0.002856196	0.026881439	0.003516668	0.023707364	0.002986906	0.030704957	0.002813942	0.026447914	0.002114472
0.4348	0.4349	0.02115	0.027767092	0.002426776	0.031700181	0.002855899	0.02962952	0.002803794	0.029167773	0.002687277	0.030685609	0.003029983	0.024706239	0.003795179	0.028657224	0.002840303	0.028875817	0.002393981	0.032956676	0.002109732
0.4392	0.4392	0.02135	0.026702852	0.002356868	0.033720847	0.002847212	0.02902362	0.00280871	0.029321933	0.00257308	0.032399369	0.002839126	0.028845839	0.003280361	0.029377964	0.003120118	0.028770677	0.002618737	0.030588763	0.0021142
0.4435	0.4435	0.02154	0.028455832	0.002629728	0.02333068	0.002827438	0.02688714	0.002742268	0.029904353	0.002552149	0.024825689	0.002854525	0.029050959	0.003368792	0.029502424	0.003066342	0.030918447	0.002504423	0.026848182	0.002110264
0.4478	0.4478	0.02173	0.030096162	0.002519474	0.024052301	0.002754776	0.0283306	0.002635957	0.029878893	0.002648067	0.025003529	0.002960529	0.027272719	0.003480977	0.029230024	0.002884935	0.025759287	0.002826976	0.030074128	0.002093215
0.4521	0.4521	0.02193	0.026526912	0.002596514	0.029144564	0.002872636	0.02532742	0.002788799	0.028628913	0.002751673	0.028149769	0.00309937	0.031797759	0.003244966	0.027630704	0.002792391	0.026448027	0.002787029	0.030618585	0.00220638
0.4563	0.4563	0.02212	0.029511472	0.00279033	0.031254566	0.003151106	0.03002892	0.0029531	0.028101933	0.002667767	0.031492089	0.003087871	0.021642719	0.003541707	0.025682044	0.00289534	0.035854457	0.002693408	0.028499453	0.002294927
0.4606	0.4606	0.02231	0.025281372	0.002559275	0.028471999	0.003154872	0.02715982	0.002967181	0.031679613	0.002765792	0.025941449	0.002954369	0.034466799	0.00365917	0.025766904	0.003072282	0.030348777	0.002689535	0.029936919	0.002220793
0.4648	0.4648	0.0225	0.031749362	0.002400651	0.030404888	0.002824159	0.02865052	0.002895076	0.030879953	0.002707902	0.031635209	0.003019871	0.027864159	0.003725367	0.028538984	0.002883325	0.031028947	0.002675088	0.030959103	0.002284585
0.469	0.469	0.02269	0.030309652	0.002560119	0.031933713	0.002835592	0.03089336	0.002833907	0.027485853	0.002514201	0.029633609	0.002908999	0.028503439	0.00357321	0.028902184	0.002925417	0.028903707	0.002676891	0.028428762	0.002324095
0.4732	0.4732	0.02288	0.030425512	0.002485202	0.031827601	0.002883029	0.02632678	0.002861635	0.030044933	0.002632803	0.027853769	0.003080132	0.022626159	0.003393982	0.036043964	0.002889676	0.025415977	0.002600921	0.027707826	0.002187902
0.4773	0.4774	0.02307	0.026691042	0.002581186	0.03133215	0.00264625	0.03169132	0.003075198	0.030050873	0.002558784	0.028748649	0.002891385	0.031280879	0.003438015	0.028975444	0.003057413	0.027374937	0.00273617	0.027562565	0.002249673
0.4815	0.4815	0.02325	0.025485202	0.0026625	0.02986038	0.002904225	0.03368156	0.003325502	0.027764473	0.00294916	0.028436009	0.00316896	0.031452879	0.003594922	0.028096864	0.0033557	0.028105527	0.002945024	0.027332556	0.002331495
0.4856	0.4857	0.02344	0.030666892	0.002501312	0.031725877	0.002938443	0.028773	0.002974267	0.024771193	0.002629671	0.031842809	0.002752772	0.032540479	0.003687904	0.031696324	0.002947368	0.029251287	0.002853049	0.028943388	0.002404276
0.4897	0.4898	0.02363	0.026561222	0.00247277	0.029648934	0.003021504	0.02524482	0.002854523	0.027026193	0.00264927	0.025892729	0.002987791	0.025042959	0.003737123	0.029941144	0.002958233	0.031396907	0.002765678	0.030551746	0.002256192
0.4938	0.4939	0.02381	0.031355632	0.002706259	0.032567556	0.00303726	0.02973474	0.002761181	0.031855553	0.002713391	0.030230009	0.00325291	0.034317119	0.003601301	0.028410844	0.00316602	0.028614027	0.002721998	0.029215777	0.002312717
0.4979	0.4979	0.024	0.031875942	0.002911713	0.031777907	0.003192345	0.02759062	0.002992414	0.030507133	0.003117218	0.025710809	0.003379646	0.025943679	0.003522506	0.029058604	0.003212385	0.031434457	0.002785355	0.024722285	0.002529916
0.502	0.502	0.02418	0.031561612	0.002891186	0.029411792	0.003224927	0.02878714	0.003266916	0.030593973	0.003146057	0.032959449	0.003524812	0.027484559	0.004131069	0.027285324	0.003541329	0.023273567	0.002922472	0.026114588	0.002652393
0.506	0.506	0.02436	0.031443602	0.003176148	0.027973717	0.003559554	0.03074966	0.003389488	0.027501973	0.003372358	0.027412889	0.00361816	0.025931279	0.004861985	0.026691024	0.003551129	0.030431387	0.003266234	0.024408394	0.002822753
0.51	0.51	0.02454	0.030811702	0.003277406	0.028629504	0.003716713	0.03158524	0.003756062	0.025211893	0.003432627	0.029496489	0.004500933	0.029980719	0.004355753	0.031953164	0.003483449	0.024769057	0.00337781	0.030770172	0.002593667
0.514	0.514	0.02473	0.025991552	0.003790475	0.022075665	0.004052726	0.0326672	0.003850916	0.028238833	0.003539266	0.022980649	0.004467062	0.030615919	0.005874307	0.026570804	0.004266263	0.031612547	0.003768153	0.029887462	0.003028491
0.518	0.518	0.02491	0.027111572	0.003923065	0.023034429	0.004465691	0.02511696	0.004369007	0.026888153	0.003913984	0.026744729	0.004160675	0.032000559	0.005565107	0.027791084	0.004517455	0.029317787	0.004133809	0.026793138	0.002790281
0.522	0.522	0.02509	0.027760612	0.00407121	0.027612907	0.004619958	0.02594208	0.004583901	0.030100373	0.00423251	0.033525209	0.004695849	0.032669599	0.005140688	0.027954864	0.004986334	0.031893627	0.004453391	0.032241106	0.003459982
0.5259	0.5259	0.02526	0.030425482	0.004390999	0.023076123	0.005094966	0.03074626	0.004812059	0.028963533	0.004333537	0.032967769	0.004941718	0.028530879	0.00559428	0.030810384	0.004952719	0.024769057	0.004594479	0.029406725	0.003874016
